# Supplementary material for: Evaluation of a unique and innovative diabetes care model in primary care in Ontario, Canada: protocol for a multiple-methods study with a convergent parallel design
Source: HighWire-hosted journal article supplement (doi:10.1136/bmjopen-2024-088737), 2024-06-01
Supplement: bmjopen-2024-088737supp002_data_supplement.pdf [file bmjopen-2024-088737supp002_data_supplement.pdf]

**Appendix Table 2****Summary of data sources and proposed use in complications study and cost effectiveness study**

| <b>Data Source(s)</b>                                                           | <b>Description and Proposed Use</b>                                                                             |
|---------------------------------------------------------------------------------|-----------------------------------------------------------------------------------------------------------------|
| WebDR                                                                           | EMR data from Primary Care Diabetes Support Program<br>Exposure or exposure definition                          |
| Ontario Diabetes Database (ODD)                                                 | ICES-validated diabetes cohort<br>Cohort creation                                                               |
| Registered Persons Database (RPDB)                                              | Database of OHIP eligible Ontarians<br>Cohort creation<br>Predictor/cofactor/covariate<br>Cohort stratification |
| Canadian Institute of Health Information Discharge Abstract Database (CIHI-DAD) | Database of hospitalizations<br>Cohort creation<br>Outcome or outcome definition                                |
| National Ambulatory Care Reporting System (NACRS)                               | Database of emergency department, outpatient visits<br>Cohort creation<br>Outcome or outcome definition         |
| Ontario Health Insurance Plan (OHIP) Database                                   | Database of physician visits<br>Cohort creation<br>Outcome or outcome definition                                |
| Canadian Organ Replacement Register (CORR) Database                             | Database of organ transplants<br>Cohort creation<br>Outcome or outcome definition                               |
| Trillium Gift of Life Network (TGLN) Database                                   | Database of organ transplants<br>Cohort creation<br>Outcome or outcome definition                               |
| Client Agency Program Enrolment (CAPE)                                          | Database of patient enrolment to primary care providers<br>Cohort creation<br>Predictor/cofactor/covariate      |
| Immigration, Refugees and Citizenship Canada Permanent Residents Database (CIC) | Cohort creation<br>Predictor/cofactor/covariate                                                                 |
| Ontario Marginalization Index (ONMARG)                                          | Database of patient enrolment to primary care providers<br>Cohort creation<br>Predictor/cofactor/covariate      |
| Ontario Asthma dataset (ASTHMA)                                                 | ICES-validated asthma cohort<br>Predictor/cofactor/covariate                                                    |
| Congestive Heart Failure (CHF)                                                  | ICES-validated congestive heart failure cohort<br>Predictor/cofactor/covariate                                  |
| Chronic Obstructive Pulmonary Disease (COPD)                                    | ICES-validated chronic obstructive pulmonary disease cohort<br>Predictor/cofactor/covariate                     |
| Ontario Hypertension dataset HYPER                                              | ICES-validated hypertension cohort<br>Predictor/cofactor/covariate                                              |
| Ontario Dementia Database (DEMENTIA)                                            | ICES-validated dementia cohort<br>Predictor/cofactor/covariate                                                  |
| Ontario HIV Database (HIV)                                                      | ICES-validated HIV cohort<br>Predictor/cofactor/covariate                                                       |

|                                                               |                                                                            |
|---------------------------------------------------------------|----------------------------------------------------------------------------|
| Ontario Rheumatoid Arthritis Database (ORAD)                  | ICES-validated rheumatoid arthritis cohort<br>Predictor/cofactor/covariate |
| Ontario Crohn’s and Colitis Cohort dataset (OCCC)             | ICES-validated Chron’s and Colitis cohort<br>Predictor/cofactor/covariate  |
| Ontario Case Costing initiative (OCCI)                        | Costs<br>Outcome or outcome definition                                     |
| Ontario Laboratory Information System (OLIS)                  | Lab tests<br>Outcome or outcome definition                                 |
| Laboratory Data from South-western Ontario hospitals (CERNER) | Lab tests<br>Outcome or outcome definition                                 |
| Ontario Drug Benefit (ODB)                                    | Prescription drugs for 65+ year old<br>Outcome or outcome definition       |
